# Supplementary material for: Patterns of triclosan resistance in Vibrionaceae
Source: PeerJ. 2018 Jul 12;6:e5170. doi: 10.7717/peerj.5170 (PMC6046194; doi:10.7717/peerj.5170)
Supplement: Data S1 — Tabs in this data file include: isolate source, MIC data, and assigned accession numbers (tab 1), hsp60 BLAST identification results (tab 2), and type strain accession numbers used to build hsp60 tree (tab 3). [file peerj-06-5170-s001.xlsx]

## Sheet: Metadata_and_Accession_Nos
	Vibrionaceae Isolates Characterized in this Study										Previously Characterized Vibrionaceae Isolates
	Isolate #	NCBI Accession Numbers	hsp60 tree- Closet Clade	BLAST- Closest Species Match	BLAST Closet Match Percent Identity	Triclosan MIC (µg mL^-1) Rep #1	Triclosan MIC (µg mL^-1) Rep #2	Triclosan MIC (µg mL^-1)			Clade	Species	Strain	Origin	Triclosan MIC (µg mL^-1)Tech Rep #1	Triclosan MIC (µg mL^-1)Tech Rep #2	Triclosan MIC (µg mL^-1)
	CB 1	MG975785	Harveyi	Vibrio alginolyticus	97.9	25	25	25			Cholerae	Vibrio cholerae El Tor	ATCCa 39316	Clinical	12.5	12.5	12.5
	CB 2	MG975786	Harveyi	Vibrio rotiferianus	96.2	25	25	25			Cholerae	Vibrio cholerae MO10	RCb 36	Modified clinical	12.5	12.5	12.5
	CB 3	MG975787	Orientalis	Vibrio brasiliensis	97.7	50	50	50			Cholerae	Vibrio furnissii	ATCC 35016	Environmental	6.25	12.5	9.4
	CB 4	MG975788	Harveyi	Vibrio harveyi	98.3	25	25	25			Cholerae	Vibrio mimicus	ATCC 33653	Clinical	12.5	25	18.8
	CB 5	MG975789	Damselae	Photobacterium damselae	98.1	100	100	100			Cholerae	Vibrio mimicus	RC 55	Environmental	12.5	25	18.8
	CB 6	MG975790	Unknown	Photobacterium sp.	86.7	3.125	3.125	3.125			Fischeri	Alivibrio fischeri	ATCC 700601	Environmental	25	25	25
	CB 7	MG975791	Harveyi	Vibrio campbellii	98.4	25	50	37.5			Harveyi	Vibrio alginolyticus	ATCC 33839	Environmental	6.25	12.5	9.4
	CB 8	MG975792	Harveyi	Vibrio harveyi	99.8	25	25	25			Harveyi	Vibrio campbelli	ATCC 25920	Environmental	12.5	12.5	12.5
	CB 9	MG975793	Damselae	Photobacterium damselae	99	25	25	25			Harveyi	Vibrio harveyi	ATCC 14126	Environmental	12.5	12.5	12.5
	CB 10	MG975794	Harveyi	Vibrio harveyi	99	25	25	25			Harveyi	Vibrio parahaemolyticus	ATCC 17803	Clinical	12.5	25	18.8
	CB 11	MG975795	Harveyi	Vibrio alginolyticus	99	25	25	25			Harveyi	Vibrio parahaemolyticus	ATCC BAA238	Clinical	50	50	50
	CB 12	MG975796	Harveyi	Vibrio alginolyticus	99	25	50	37.5			Harveyi	Vibrio parahaemolyticus	ATCC 43996	Environmental	25	25	25
	CB 13	MG975797	Harveyi	Vibrio harveyi	99.8	50	50	50			Splendidus	Vibrio pelagius	ATCC 25916a	Environmental	25	25	25
	CB 14	MG975798	Harveyi	Vibrio rotiferianus	98.5	100	100	100			Splendidus	Vibrio splendidus	ATCC 33869	Environmental	25	25	25
	CB 15	MG975799	Harveyi	Vibrio harveyi	98.5	50	50	50			Vulnificus	Vibrio vulnificus	ATCC 27562	Clinical	6.25	12.5	9.4
	CB 16	MG975800	Harveyi	Vibrio campbellii	99.3	50	50	50			Unknown	Vibrio sp. Ex 96	RC 96	Environmental	25	25	25
	CB 17	-	-	-	-	50	50	50			Non-Vibrio	Escherichia coli	ATCC 15597	-	3.125	3.125	3.1
	CB 18	MG975801	Harveyi	Vibrio campbellii	97.9	50	100	75			a American Type Culture Collection (ATCC)
	CB 19	MG975802	Harveyi	Vibrio harveyi	99.3	25	25	25			b Courteously provided by Dr. Rita R Colwell (RC), University of Maryland
	DA 1	MG975803	Harveyi	Vibrio alginolyticus	99	25	25	25
	DA 2	MG975804	Harveyi	Vibrio alginolyticus	98.8	25	50	37.5
	DA 3	MG975805	Harveyi	Vibrio alginolyticus	95.6	50	50	50
	DA 4	MG975806	Harveyi	Vibrio alginolyticus	98.2	50	50	50
	DA 5	MG975807	Unknown	Photobacterium sp.	89.1	3.125	3.125	3.125
	DA 6	MG975808	Harveyi	Vibrio alginolyticus	97.9	100	100	100
	DA 7	MG975809	Harveyi	Vibrio alginolyticus	95.2	100	100	100
	DA 8	MG975810	Unknown	Vibrio sp.	99.5	25	25	25
	DA 9	MG975811	Vulnificus	Vibrio vulnificus	84.6	25	50	37.5
	DA 10	MG975812	Harveyi	Vibrio alginolyticus	98.8	100	100	100
	DA 11	MG975813	Harveyi	Vibrio alginolyticus	99.2	50	50	50
	DA 12	MG975814	Harveyi	Vibrio alginolyticus	97.1	200	200	200
	DA 13	MG975815	Harveyi	Vibrio alginolyticus	98.7	50	50	50
	DA 14	MG975816	Harveyi	Vibrio alginolyticus	98.8	50	50	50
	DA 15	MG975817	Harveyi	Vibrio harveyi	98.1	50	50	50
	DA 16	MG975818	Unknown	Vibrio sp.	99.4	25	25	25
	DA 17	MG975819	Harveyi	Vibrio alginolyticus	98.6	25	25	25
	DA 18	MG975820	Harveyi	Vibrio alginolyticus	96.7	25	25	25
	DA 19	MG975821	Harveyi	Vibrio alginolyticus	98.8	25	25	25
	DA 20	-	-	-	-	50	50	50
	LK 2	MG975822	Harveyi	Vibrio harveyi	98.5	25	25	25
	LK 3	MG975823	Damselae	Photobacterium damselae	95.9	100	100	100
	LK 4	-	-	-	-	100	100	100
	LK 5	MG975824	Damselae	Photobacterium damselae	98.7	50	50	50
	LK 6	MG975825	Harveyi	Vibrio rotiferianus	100	50	50	50
	LK 7	MG975826	Coralliilyticus	Vibrio coralliilyticus	95.7	6.25	6.25	6.25
	LK 8	MG975827	Unknown	Vibrio tubiashii	89.5	100	100	100
	LK 9	MG975828	Harveyi	Vibrio harveyi	98.3	25	25	25
	LK 10	MG975829	Unknown	Photobacterium sp.	85.8	300	300	300
	LK 11	MG975830	Splendidus	Vibrio crassostreae	90.3	500	600	550
	LK 12	MG975831	Unknown	Vibrio tubiashii	87.5	50	50	50
	LK 14	MG975832	Unknown	Vibrio tubiashii	88.5	50	25	37.5
	LK 15	MG975833	Unknown	Vibrio tubiashii	88.5	50	50	50
	LK 17	MG975834	Unknown	Vibrio ezurae	89.6	50	50	50
	LK 18	MG975835	Harveyi	Vibrio campbellii	98.3	25	25	25

## Sheet: hsp60_Identification_Results
	Closest ID		OPT	BITS	E	Percent Identity	cpnDB ID	Database Accession Number
CB_1	Vibrio alginolyticus	ATCC 17749	2338	29.6	1.4	97.9	b1172	AF230930
	Vibrio sp. 971599		2149	28.3	3.2	93.6	b1192	AF230958
	Vibrio parahaemolyticus	ATCC 17	1955	27.1	7.8	89.2	b1188	AF230951
	Vibrio harveyi	ATCC 35084	1807	26.1	15	85.7	b1183	AF230934
	Vibrio campbellii	CAIM	1798	26	16	85.5	b22976	NZ_AMDG01000018
CB_2	Vibrio rotiferianus	DAT	2242	28.3	3.3	96.2	b19714	NZ_AFAJ01000004
	Vibrio harveyi	ATCC 35084	2197	28	4	95.2	b1183	AF230934
	Vibrio campbellii	CAIM	2161	27.8	4.7	94.4	b22976	NZ_AMDG01000018
	Vibrio azureus	NBRC 1045	1972	26.6	11	90	b27939	BATL01000053
	Vibrio orientalis	CIP 1028	1873	26	16	87.7	b15325	ACZV01000003
CB_3	Vibrio brasiliensis	LMG 20	2311	29	2.1	97.7	b18547	AEVS01000031
	Vibrio crassostreae	ZF-	1879	26.2	14	87.8	b27328	NZ_AJZC01000106
	Vibrio orientalis	CIP 1028	1879	26.2	14	87.8	b15325	ACZV01000003
	Vibrionales sp.	SWAT-3	1843	26	17	86.9	b10158	AAZW01000013
	Photobacterium sp.	AK15	1838	25.9	17	86.9	b22761	AMZO01000004
CB_4	Vibrio harveyi	ATCC 35084	2341	27.9	4.6	98.3	b1183	AF230934
	Vibrio rotiferianus	DAT	2273	27.5	6	96.9	b19714	NZ_AFAJ01000004
	Vibrio campbellii	CAIM	2233	27.3	7	95.9	b22976	NZ_AMDG01000018
	Vibrio azureus	NBRC 1045	1963	25.8	20	89.6	b27939	BATL01000053
	Vibrio coralliilyticus		1904	25.4	25	88.4	b26913	NZ_AEQS01000202
CB_5	Photobacterium damselae	ATCC 35084	2335	27.2	8.7	98.1	b1170	AF230942
	Vibrio fischeri	DAT	1912	25	39	88.4	b9372	NC_006840
	Aliivibrio fischeri	ZF-	2233	24.5	39	86.9	b27342	NZ_AJYI01000084
	Vibrio breoganii	ZF-29	1849	24.4	39	85.9	b26951	NZ_AJYM01000159
	Vibrionales sp.	SWAT-3	1804	24.4	39	85.7	b20258	AAZW01000013
CB_6	Photobacterium sp.	AK15	2015	25.2	30	86.7	b22761	AMZO01000004
	Photobacterium marinum		2015	25.2	30	86.7	b29666	NZ_AMZO01000004
	Vibrio orientalis	CIP 1028	1984	25.1	34	86	b15325	ACZV01000003
	Vibrio sinaloensis	DSM 213	1979	25	34	85.9	b18546	AEVT01000090
	Vibrio ezurae	NBRC 10	1974	25	35	85.9	b28015	NZ_BATM01000045
CB_7	Vibrio campbellii	CAIM	2132	29	1.9	98.4	b22976	NZ_AMDG01000018
	Vibrio rotiferianus	DAT	2091	28.7	2.3	97.5	b19714	NZ_AFAJ01000004
	Vibrio harveyi	ATCC 35084	2060	28.5	2.7	96.6	b1183	AF230934
	Vibrio azureus	NBRC 1045	1853	27	7.6	91.3	b27939	BATL01000053
	Vibrio parahaemolyticus	ATCC 17	1794	26.6	10	90	b1188	AF230951
CB_8	Vibrio harveyi	ATCC 35084	2186	27.6	5	99.8	b1183	AF230934
	Vibrio rotiferianus	DAT	2091	27	7.4	97.5	b19714	NZ_AFAJ01000004
	Vibrio campbellii	CAIM	2051	26.8	8.7	96.4	b22976	NZ_AMDG01000018
	Vibrio azureus	NBRC 1045	1808	25.3	24	90.2	b27939	BATL01000053
	Vibrio sp.	971599	1745	25	31	88.6	b1192	AF230958
CB_9	Photobacterium damselae	ATCC 33	2365	27.3	6.9	99	b1170	AF230942
	Vibrio fischeri	ES114	1906	24.9	35	88.4	b9372	NC_006840
	Aliivibrio fischeri	ZF-	1843	24.6	44	86.9	b27342	NZ_AJYI01000084
	Vibrio breoganii	ZF-29	1807	24.4	50	86.1	b26951	NZ_AJYM01000159
	Photobacterium marinum		1802	24.4	51	86.1	b29666	NZ_AMZO01000004
CB_10	Vibrio harveyi	ATCC 35084	2371	28.1	4	99	b1183	AF230934
	Vibrio rotiferianus	DAT	2285	27.6	5.6	97.1	b19714	NZ_AFAJ01000004
	Vibrio campbellii	CAIM	2245	27.4	6.5	96.1	b22976	NZ_AMDG01000018
	Vibrio azureus	NBRC 1045	1993	25.9	17	90.2	b27939	BATL01000053
	Vibrio coralliilyticus		1925	25.6	23	88.8	b26913	NZ_AEQS01000202
CB_11	Vibrio alginolyticus	ATCC 17749	2360	29.6	1.3	99	b1172	AF230930
	Vibrio sp.	971599	2180	28.4	2.9	94.8	b1192	AF230958
	Vibrio parahaemolyticus	ATCC 17	1982	27.1	7.2	90.2	b1188	AF230951
	Vibrio harveyi	ATCC 35084	1847	26.3	13	87.1	b1183	AF230934
	Vibrio rotiferianus	DAT	1838	26.2	14	86.9	b19714	NZ_AFAJ01000004
CB_12	Vibrio alginolyticus	ATCC 17749	2368	29.6	1.3	99	b1172	AF230930
	Vibrio sp.	971599	2170	28.3	3.3	94.4	b1192	AF230958
	Vibrio parahaemolyticus	ATCC 17	1967	27	8.2	89.8	b1188	AF230951
	Vibrio harveyi	ATCC 35084	1837	26.2	15	86.7	b1183	AF230934
	Vibrio campbellii	CAIM	1828	26.1	15	86.5	b22976	NZ_AMDG01000018
CB_13	Vibrio harveyi	ATCC 35084	2396	28.4	3.2	99.8	b1183	AF230934
	Vibrio rotiferianus	DAT	2292	27.8	4.9	97.5	b19714	NZ_AFAJ01000004
	Vibrio campbellii	CAIM	2252	27.5	5.7	96.5	b22976	NZ_AMDG01000018
	Vibrio azureus	NBRC 1045	1977	26	17	90.2	b27939	BATL01000053
	Vibrio coralliilyticus		1905	25.6	23	88.5	b26913	NZ_AEQS01000202
CB_14	Vibrio rotiferianus	DAT	2347	29.4	1.6	98.5	b19714	NZ_AFAJ01000004
	Vibrio campbellii	CAIM	2325	29.3	1.7	97.9	b22976	NZ_AMDG01000018
	Vibrio harveyi	ATCC 35084	2307	29.2	1.9	97.5	b1183	AF230934
	Vibrio azureus	NBRC 1045	2037	27.4	6.4	91.3	b27939	BATL01000053
	Vibrio sp.	971599	1920	26.6	11	88.6	b1192	AF230958
CB_15	Vibrio campbellii	CAIM	2337	29.7	1.3	98.5	b22976	NZ_AMDG01000018
	Vibrio rotiferianus	DAT	2296	29.4	1.6	97.7	b19714	NZ_AFAJ01000004
	Vibrio harveyi	ATCC 35084	2256	29.1	1.9	96.7	b1183	AF230934
	Vibrio azureus	NBRC 1045	2013	27.5	6	91	b27939	BATL01000053
	Vibrio parahaemolyticus	ATCC 17	1936	27	8.6	89.4	b1188	AF230951
CB_16	Vibrio campbellii	CAIM	2163	28.6	2.5	99.3	b22976	NZ_AMDG01000018
	Vibrio rotiferianus	DAT	2100	28.1	3.3	97.7	b19714	NZ_AFAJ01000004
	Vibrio harveyi	ATCC 35084	2064	27.9	3.9	96.8	b1183	AF230934
	Vibrio azureus	NBRC 1045	1830	26.3	12	90.9	b27939	BATL01000053
	Vibrio parahaemolyticus	ATCC 17	1794	26.1	14	90	b1188	AF230951
CB_18	Vibrio campbellii	CAIM	2535	29.4	1.6	97.9	b22976	NZ_AMDG01000018
	Vibrio rotiferianus	DAT	2494	29.2	1.9	97.1	b19714	NZ_AFAJ01000004
	Vibrio harveyi	ATCC 35084	2450	28.9	2.3	96	b1183	AF230934
	Vibrio azureus	NBRC 1045	2148	27.1	8.3	89.7	b27939	BATL01000053
	Vibrio parahaemolyticus	ATCC 17	2139	27	8.6	89.5	b1188	AF230951
CB_19	Vibrio harveyi	ATCC 35084	2173	27.5	5.6	99.3	b1183	AF230934
	Vibrio rotiferianus	DAT	2096	27	7.6	97.5	b19714	NZ_AFAJ01000004
	Vibrio campbellii	CAIM	2056	26.8	9	96.4	b22976	NZ_AMDG01000018
	Vibrio azureus	NBRC 1045	1831	25.4	23	90.7	b27939	BATL01000053
	Vibrio sp.	971599	1768	25.1	29	89.1	b1192	AF230958
DA_1	Vibrio alginolyticus	ATCC 17749	2365	29.7	1.3	99	b1172	AF230930
	Vibrio sp.	971599	2185	28.5	2.9	94.8	b1192	AF230958
	Vibrio parahaemolyticus	ATCC 17	1982	27.2	7.3	90.2	b1188	AF230951
	Vibrio harveyi	ATCC 35084	1852	26.3	13	87.1	b1183	AF230934
	Vibrio campbellii	CAIM	1843	26.3	14	86.9	b22976	NZ_AMDG01000018
DA_2	Vibrio alginolyticus	ATCC 17749	2349	29.6	1.3	98.8	b1172	AF230930
	Vibrio sp.	971599	2169	28.5	3	94.6	b1192	AF230958
	Vibrio parahaemolyticus	ATCC 17	1966	27.1	7.6	90	b1188	AF230951
	Vibrio harveyi	ATCC 35084	1836	26.3	14	86.9	b1183	AF230934
	Vibrio campbellii	CAIM	1827	26.2	14	86.7	b22976	NZ_AMDG01000018
DA_3	Vibrio alginolyticus	ATCC 17749	2241	27.3	6.5	95.6	b1172	AF230930
	Vibrio sp.	971599	2043	26.2	14	91	b1192	AF230958
	Vibrio parahaemolyticus	ATCC 17	1867	25.2	27	87	b1188	AF230951
	Vibrio harveyi	ATCC 35084	1764	24.7	40	84.5	b1183	AF230934
	Vibrio campbellii	CAIM	1755	24.6	41	84.3	b22976	NZ_AMDG01000018
DA_4	Vibrio alginolyticus	ATCC 17749	2135	28.3	3	98.2	b1172	AF230930
	Vibrio sp.	971599	1973	27.3	6.3	94.1	b1192	AF230958
	Vibrio parahaemolyticus	ATCC 17	1752	25.8	17	88.6	b1188	AF230951
	Vibrio campbellii	CAIM	1649	25.1	27	85.9	b22976	NZ_AMDG01000018
	Vibrio harveyi	ATCC 35084	1649	25.1	27	85.9	b1183	AF230934
DA_5	Photobacterium sp.	AK15	1922	26.8	9	89.1	b22761	AMZO01000004
	Photobacterium marinum		1922	26.8	9	89.1	b29666	NZ_AMZO01000004
	Vibrio nigripulchritudo	AT	1864	26.4	12	87.7	b19468	AFWJ01000035
	Vibrionales sp.	SWAT-3	1792	25.9	17	86	b10158	AAZW01000013
	Enterovibrio nigricans		1787	25.9	17	86	b29226	NZ_FUXU01000056
DA_6	Vibrio alginolyticus	ATCC 17749	2308	29.4	1.6	97.9	b1172	AF230930
	Vibrio sp.	971599	2110	28.1	3.9	93.3	b1192	AF230958
	Vibrio parahaemolyticus	ATCC 17	1907	26.8	9.8	88.6	b1188	AF230951
	Vibrio harveyi	ATCC 35084	1804	26.1	16	86.1	b1183	AF230934
	Vibrio campbellii	CAIM	1795	26	16	85.9	b22976	NZ_AMDG01000018
DA_7	Vibrio alginolyticus	ATCC 17749	2150	27.4	5.8	95.2	b1172	AF230930
	Vibrio sp.	971599	1956	26.3	13	90.6	b1192	AF230958
	Vibrio parahaemolyticus	ATCC 17	1785	25.3	25	86.5	b1188	AF230951
	Vibrio harveyi	ATCC 35084	1677	24.6	39	83.9	b1183	AF230934
	Vibrio campbellii	CAIM	1668	24.6	41	83.7	b22976	NZ_AMDG01000018
DA_8	Vibrio sp.	971599	2180	30.7	0.57	99.5	b1192	AF230958
	Vibrio alginolyticus	ATCC 17749	2000	29.3	1.5	95	b1172	AF230930
	Vibrio parahaemolyticus	ATCC 17	1824	27.9	4	90.6	b1188	AF230951
	Vibrio campbellii	CAIM	1766	27.5	5.5	89.1	b22976	NZ_AMDG01000018
	Vibrio harveyi	ATCC 35084	1757	27.4	5.8	88.8	b1183	AF230934
DA_9	Vibrio vulnificus	ATCC 27562	1744	25.2	28	84.6	b1193	AF230955
	Vibrio proteolyticus	ATC	1708	25	33	83.7	b27940	BATJ01000004
	Vibrio anguillarum	775	1636	24.6	45	82	b19122	CP002284
	Listonella anguillarum	ATCC 192	1636	24.6	45	82	b1168	AF230932
	Vibrio ordalii	ATCC 335	1600	24.3	52	81.2	b20202	NZ_AEZC01000025
DA_10	Vibrio alginolyticus	ATCC 17749	2457	29.6	1.4	98.8	b1172	AF230930
	Vibrio sp.	971599	2241	28.2	3.6	94	b1192	AF230958
	Vibrio parahaemolyticus	ATCC 17	2056	27.1	8	90	b1188	AF230951
	Vibrio harveyi	ATCC 35084	1908	26.2	15	86.6	b1183	AF230934
	Vibrio campbellii	CAIM	1899	26.1	16	86.4	b22976	NZ_AMDG01000018
DA_11	Vibrio alginolyticus	ATCC 17749	2374	28.9	2.2	99.2	b1172	AF230930
	Vibrio sp.	971599	2176	27.7	5	94.6	b1192	AF230958
	Vibrio parahaemolyticus	ATCC 17	1964	26.4	12	89.8	b1188	AF230951
	Vibrio harveyi	ATCC 35084	1843	25.7	20	86.9	b1183	AF230934
	Vibrio campbellii	CAIM	1834	25.6	21	86.7	b22976	NZ_AMDG01000018
DA_12	Vibrio alginolyticus	ATCC 17749	2505	29.2	2	97.1	b1172	AF230930
	Vibrio sp.	971599	2289	27.9	4.9	92.5	b1192	AF230958
	Vibrio parahaemolyticus	ATCC 17	2104	26.8	10	88.7	b1188	AF230951
	Vibrio harveyi	ATCC 35084	1965	26	18	85.6	b1183	AF230934
	Vibrio campbellii	CAIM	1956	25.9	19	85.4	b22976	NZ_AMDG01000018
DA_13	Vibrio alginolyticus	ATCC 17749	2334	29.5	1.5	98.7	b1172	AF230930
	Vibrio sp.	971599	2127	28.1	3.8	93.9	b1192	AF230958
	Vibrio parahaemolyticus	ATCC 17	1933	26.9	9.2	89.5	b1188	AF230951
	Vibrio harveyi	ATCC 35084	1794	25.9	17	86.2	b1183	AF230934
	Vibrio campbellii	CAIM	1785	25.9	18	86	b22976	NZ_AMDG01000018
DA_14	Vibrio alginolyticus	ATCC 17749	2362	29.7	1.3	98.8	b1172	AF230930
	Vibrio sp.	971599	2164	28.4	3.2	94.2	b1192	AF230958
	Vibrio parahaemolyticus	ATCC 17	1961	27	8.1	89.6	b1188	AF230951
	Vibrio harveyi	ATCC 35084	1831	26.2	15	86.5	b1183	AF230934
	Vibrio campbellii	CAIM	1822	26.1	15	86.3	b22976	NZ_AMDG01000018
DA_15	Vibrio harveyi	ATCC 35084	2342	27.5	6	98.1	b1183	AF230934
	Vibrio rotiferianus	DAT	2274	27.1	7.8	96.7	b19714	NZ_AFAJ01000004
	Vibrio campbellii	CAIM	2216	26.8	9.6	95.2	b22976	NZ_AMDG01000018
	Vibrio azureus	NBRC 1045	1950	25.4	26	89.2	b27939	BATL01000053
	Vibrio coralliilyticus		1896	25.1	32	87.9	b26913	NZ_AEQS01000202
DA_16	Vibrio sp.	971599	2378	30.9	0.58	99.4	b1192	AF230958
	Vibrio alginolyticus	ATCC 17749	2162	29.3	1.7	94.4	b1172	AF230930
	Vibrio parahaemolyticus	ATCC 17	2013	28.2	3.6	91	b1188	AF230951
	Vibrio campbellii	CAIM	1928	27.6	5.5	89	b22976	NZ_AMDG01000018
	Vibrio harveyi	ATCC 35084	1928	27.6	5.5	89	b1183	AF230934
DA_17	Vibrio alginolyticus	ATCC 17749	2147	28	3.9	98.6	b1172	AF230930
	Vibrio sp.	971599	1985	27	7.9	94.5	b1192	AF230958
	Vibrio parahaemolyticus	ATCC 17	1764	25.6	20	89	b1188	AF230951
	Vibrio campbellii	CAIM	1652	24.9	33	86.1	b22976	NZ_AMDG01000018
	Vibrio harveyi	ATCC 35084	1652	24.9	33	86.1	b1183	AF230934
DA_18	Vibrio alginolyticus	ATCC 17749	1612	25.8	13	96.7	b1172	AF230930
	Vibrio sp.	971599	1540	25.3	18	94.4	b1192	AF230958
	Vibrio parahaemolyticus	ATCC 17	1373	24.1	41	89	b1188	AF230951
	Vibrio cyclitrophicus	LMG 21359	1313	23.7	55	87.4	b7880	AM162552
	Vibrio orientalis	CIP 1028	1310	23.7	56	86.9	b15325	ACZV01000003
DA_19	Vibrio alginolyticus	ATCC 17749	2359	29.6	1.4	98.8	b1172	AF230930
	Vibrio sp.	971599	2152	28.3	3.5	94	b1192	AF230958
	Vibrio parahaemolyticus	ATCC 17	1958	27	8.3	89.6	b1188	AF230951
	Vibrio harveyi	ATCC 35084	1819	26.1	16	86.3	b1183	AF230934
	Vibrio campbellii	CAIM	1810	26	16	86.1	b22976	NZ_AMDG01000018
LK_2	Vibrio harveyi	ATCC 35084	2337	27.8	4.8	98.5	b1183	AF230934
	Vibrio rotiferianus	DAT	2269	27.4	6.3	97.1	b19714	NZ_AFAJ01000004
	Vibrio campbellii	CAIM	2229	27.2	7.3	96	b22976	NZ_AMDG01000018
	Vibrio azureus	NBRC 1045	1968	25.7	20	90	b27939	BATL01000053
	Vibrio coralliilyticus		1900	25.3	26	88.5	b26913	NZ_AEQS01000202
LK_3	Photobacterium damselae	ATCC 33	2059	26.2	13	95.9	b1170	AF230942
	Vibrio fischeri	ES114	1636	23.9	61	85.1	b9372	NC_006840
	Vibrio breoganii	ZF-29	1579	23.6	76	84	b26951	NZ_AJYM01000159
	Photobacterium marinum		1577	23.6	76	83.7	b29666	NZ_AMZO01000004
	Photobacterium sp.	AK15	1577	23.6	76	83.7	b22761	AMZO01000004
LK_5	Photobacterium damselae	ATCC 33	2331	27.2	7.1	98.7	b1170	AF230942
	Vibrio fischeri	ES114	1863	24.8	38	87.8	b9372	NC_006840
	Aliivibrio fischeri	ZF-	1800	24.5	48	86.4	b27342	NZ_AJYI01000084
	Photobacterium marinum		1795	24.4	49	86.3	b29666	NZ_AMZO01000004
	Photobacterium sp.	AK15	1795	24.4	49	86.3	b22761	AMZO01000004
LK_6	Vibrio rotiferianus	DAT	2195	27.5	5.4	100	b19714	NZ_AFAJ01000004
	Vibrio harveyi	ATCC 35084	2082	26.8	8.6	97.3	b1183	AF230934
	Vibrio campbellii	CAIM	2073	26.8	8.9	97	b22976	NZ_AMDG01000018
	Vibrio azureus	NBRC 1045	1839	25.4	23	91.1	b27939	BATL01000053
	Vibrio parahaemolyticus	ATCC 17	1754	24.9	32	88.8	b1188	AF230951
LK_7	Vibrio corallilyticus	A	2478	27.9	4.9	95.7	b15337	NZ_ACZN01000020
	Vibrio coralliilyticus		2433	27.7	5.8	94.8	b26913	NZ_AEQS01000202
	Vibrio tubiashii	ATCC 1910	2235	26.6	12	90.7	b19469	AFWI01000013
	Vibrio orientalis	CIP 1028	2190	26.4	14	89.8	b15325	ACZV01000003
	Vibrio crassostreae	ZF-	2172	26.3	15	89.4	b27328	NZ_AJZC01000106
LK_8	Vibrio tubiashii	ATCC 1910	1940	25.3	27	89.5	b19469	AFWI01000013
	Vibrio lentus	10N.222.5	1904	25.1	30	88.7	b29100	NZ_MKKO01000002
	Vibrio crassostreae	ZF-	1904	25.1	30	88.7	b27328	NZ_AJZC01000106
	Vibrio splendidus	12B01	1895	25.1	31	88.5	b8008	NZ_AAMR01000009
	Vibrio ezurae	NBRC 10	1886	25	32	88.3	b28015	NZ_BATM01000045
LK_9	Vibrio harveyi	ATCC 35084	2311	27.5	5.6	98.3	b1183	AF230934
	Vibrio rotiferianus	DAT	2243	27.2	7.3	96.8	b19714	NZ_AFAJ01000004
	Vibrio campbellii	CAIM	2203	27	8.5	95.8	b22976	NZ_AMDG01000018
	Vibrio azureus	NBRC 1045	1951	25.6	22	89.9	b27939	BATL01000053
	Vibrio coralliilyticus		1883	25.2	29	88.4	b26913	NZ_AEQS01000202
LK_10	Photobacterium sp.	AK15	1681	24.4	44	85.8	b22761	AMZO01000004
	Photobacterium marinum		1681	24.4	44	85.8	b29666	NZ_AMZO01000004
	Vibrio sinaloensis	DSM 213	1663	24.3	47	85.3	b18546	AEVT01000090
	Vibrio orientalis	CIP 1028	1659	24.3	48	85.1	b15325	ACZV01000003
	Photobacterium leiognathi	subs	1650	24.2	50	84.9	b18796	DF093594
LK_11	Vibrio crassostreae	ZF-	2146	25.4	28	90.3	b27328	NZ_AJZC01000106
	Vibrio orientalis	CIP 1028	2097	25.1	33	89.2	b15325	ACZV01000003
	Vibrio tubiashii	ATCC 1910	2092	25.1	33	89.2	b19469	AFWI01000013
	Vibrio tasmaniensis	1F	2088	25.1	34	89	b27307	NZ_AJZO01000158
	Vibrio chagasii	LMG 21353	2086	25.1	34	89.3	b7878	AM162558
LK_12	Vibrio tubiashii	ATCC 1910	1890	25	34	87.5	b19469	AFWI01000013
	Vibrio crassostreae	ZF-	1881	24.9	35	87.3	b27328	NZ_AJZC01000106
	Vibrio splendidus	12B01	1881	24.9	35	87.3	b8008	NZ_AAMR01000009
	Vibrio lentus	10N.222.5	1872	24.9	36	87.1	b29100	NZ_MKKO01000002
	Vibrio ezurae	NBRC 10	1854	24.8	39	86.7	b28015	NZ_BATM01000045
LK_14	Vibrio tubiashii	ATCC 1910	1881	25.1	30	88.5	b19469	AFWI01000013
	Vibrio crassostreae	ZF-	1863	25	32	88.1	b27328	NZ_AJZC01000106
	Vibrio splendidus	12B01	1854	25	33	87.9	b8008	NZ_AAMR01000009
	Vibrio lentus	10N.222.5	1854	25	33	87.9	b29100	NZ_MKKO01000002
	Vibrio ezurae	NBRC 10	1836	24.9	35	87.5	b28015	NZ_BATM01000045
LK_15	Vibrio tubiashii	ATCC 1910	1881	25.1	30	88.5	b19469	AFWI01000013
	Vibrio crassostreae	ZF-	1863	25	32	88.1	b27328	NZ_AJZC01000106
	Vibrio splendidus	12B01	1854	25	33	87.9	b8008	NZ_AAMR01000009
	Vibrio lentus	10N.222.5	1854	25	33	87.9	b29100	NZ_MKKO01000002
	Vibrio ezurae	NBRC 10	1836	24.9	35	87.5	b28015	NZ_BATM01000045
LK_17	Vibrio ezurae	NBRC 10	1945	26.8	9.9	89.6	b28015	NZ_BATM01000045
	Vibrio splendidus	12B01	1927	26.6	11	89.1	b8008	NZ_AAMR01000009
	Vibrio crassostreae	ZF-	1918	26.6	11	88.9	b27328	NZ_AJZC01000106
	Vibrio tubiashii	ATCC 1910	1909	26.5	12	88.7	b19469	AFWI01000013
	Vibrio lentus	10N.222.5	1909	26.5	12	88.1	b29100	NZ_MKKO01000002
LK_18	Vibrio campbellii	CAIM	2336	29.6	1.4	98.3	b22976	NZ_AMDG01000018
	Vibrio rotiferianus	DAT	2295	29.3	1.6	97.5	b19714	NZ_AFAJ01000004
	Vibrio harveyi	ATCC 35084	2255	29.1	2	96.5	b1183	AF230934
	Vibrio azureus	NBRC 1045	2016	27.5	6	91	b27939	BATL01000053
	Vibrio parahaemolyticus	ATCC 17	1935	26.9	8.8	89.2	b1188	AF230951

## Sheet: TypeStrain_Accession_nos_tree
cpnDB ID	Accession Number	Vibrionaceae
b3449	AY123643	Grimontia hollisae ATCC 33564
b15655	ADAQ01000007	Grimontia hollisae CIP 101886
b1170	AF230942	Photobacterium damselae ATCC 33539
b15772	NZ_ADBS01000001	Photobacterium damselae subsp. damselae CIP 102761
b28726	NZ_MCFX02000002	Photobacterium damselae subsp. Piscicida L091106-03H NULL
b1172	AF230930	Vibrio alginolyticus ATCC 17749
b27939	BATL01000053	Vibrio azureus NBRC 104587
b18547	AEVS01000031	Vibrio brasiliensis LMG 20546
b22976	NZ_AMDG01000018	Vibrio campbellii CAIM 519 NBRC 15631
b7878	AM162558	Vibrio chagasii LMG 21353
b1179	AF230941	Vibrio cincinnatiensis ATCC 35912
b15337	NZ_ACZN01000020	Vibrio corallilyticus ATCC BAA-450
b7880	AM162552	Vibrio cyclitrophicus LMG 21359
b28015	NZ_BATM01000045	Vibrio ezurae NBRC 102218
b1180	AF230944	Vibrio fluvialis ATCC 33809
b1182	AF230946	Vibrio furnissii ATCC 35016
b1185	AF230948	Vibrio mimicus ATCC 33653
b19468	AFWJ01000035	Vibrio nigripulchritudo ATCC 27043
b15325	ACZV01000003	Vibrio orientalis CIP 102891
b1188	AF230951	Vibrio parahaemolyticus ATCC 17802
b27611	NZ_AMQV01000026	Vibrio vulnificus ATCC 27562
